# Supplementary material for: Phylogenetics and Population Genetics of the Petrolisthes lamarckii–P. haswelli Complex in China: Old Lineage and New Species
Source: MDPI journal article supplement (doi:10.3390/ijms242115843), 2023-10-31
Supplement: s1 [file s1]

Table S1. Genbank numbers for 5-gene.

| Samples | COI       | 16S      | Cytb     | 18S      | H3       |
|---------|-----------|----------|----------|----------|----------|
| XG_HS1  | OR460807  | OR466985 | OR476711 | OR467004 | OR476741 |
| XG_HS2  | OR460807  | OR466985 | OR476711 | OR467004 | OR476741 |
| XG_HS3  | OR460807  |          | OR476711 |          | OR476741 |
| XG_HS4  | OR460807  | OR466985 | OR476711 |          | OR476741 |
| XG_HS5  | OR460807  | OR466985 | OR476711 |          | OR476741 |
| XG_HS6  | OR460807  |          | OR476711 |          | OR476741 |
| XG_HS7  | OR460807  |          | OR476711 |          | OR476741 |
| XG_HS8  | OR460807  |          | OR476711 |          |          |
| XG_HS9  | OR460807  |          | OR476711 |          | OR476741 |
| XG_HS10 | OR460807  |          | OR476711 |          | OR476741 |
| XG_HS11 | OR460807  | OR466985 | OR476711 |          | OR476741 |
| XG_HS12 | OR460807  | OR466985 | OR476711 |          | OR476741 |
| XG_HS13 | OR460807  |          | OR476711 |          |          |
| XG_HS14 | OR460807  | OR466985 | OR476711 |          |          |
| XG_HS15 | OR460807  | OR466985 | OR476711 |          | OR476741 |
| XG_HS16 | OR460807  |          | OR476711 |          |          |
| XG_HS17 |           |          | OR476711 |          | OR476741 |
| XG_HS18 | OR460807  | OR466985 | OR476711 |          | OR476741 |
| XG_HS19 |           |          | OR476711 |          | OR476741 |
| XG_HS20 | OR460807  | OR466985 | OR476711 |          | OR476741 |
| XG_HS21 | OR460807  | OR466985 | OR476711 |          | OR476741 |
| XG_HS22 | OR4608010 | OR466985 | OR476711 |          |          |
| XG_HS23 | OR460807  | OR466985 | OR476711 |          | OR476741 |
| XG_HS24 | OR460807  | OR466985 | OR476711 |          |          |
| XG_HS26 | OR460807  | OR466985 | OR476711 |          |          |
| XG_HS27 | OR460807  |          | OR476711 |          |          |
| XG_HS28 | OR460807  | OR466985 | OR476711 |          | OR476741 |
| XG_HS29 |           | OR466985 | OR476711 |          | OR476741 |
| XG_HS30 | OR460807  | OR466985 | OR476711 |          |          |
| XG_HS31 | OR460807  | OR466985 | OR476711 |          |          |
| XG_HS32 | OR460807  | OR466985 | OR476711 |          |          |
| XG_HS33 | OR460807  | OR466985 | OR476711 |          |          |
| XG_HS34 | OR460807  | OR466985 | OR476711 |          | OR476741 |
| DS_HS1  | OR460807  | OR466985 | OR476711 | OR467004 | OR476741 |
| DS_HS2  | OR460807  | OR466985 | OR476711 | OR467004 | OR476741 |
| DS_HS3  | OR460807  | OR466985 | OR476711 | OR467004 | OR476741 |
| DS_HS4  | OR460807  | OR466985 | OR476711 | OR467004 | OR476741 |

|          |          |          |          |          |          |
|----------|----------|----------|----------|----------|----------|
| DS_HS5   | OR460808 | OR466986 | OR476711 | OR467004 | OR476741 |
| DS_HS6   | OR460807 | OR466985 | OR476711 | OR467004 | OR476741 |
| DS_HS7   | OR460807 | OR466985 | OR476711 | OR467004 | OR476741 |
| DS_HS8   | OR460807 | OR466985 | OR476711 |          | OR476741 |
| HZ_HS1   | OR460807 | OR466985 |          |          | OR476741 |
| HZ_HS2   | OR460807 | OR466985 |          |          |          |
| HZ_HS3   | OR460807 | OR466985 |          |          | OR476741 |
| HZ_HS4   | OR460807 | OR466985 | OR476711 |          |          |
| HZ_HS5   | OR460807 | OR466985 | OR476711 |          |          |
| HZ_HS6   | OR460807 | OR466985 | OR476711 |          |          |
| HZ_HS7   | OR460807 | OR466985 | OR476711 |          |          |
| HZ_HS8   | OR460807 | OR466985 | OR476711 |          | OR476741 |
| HZ_HS9   | OR460807 | OR466985 | OR476714 |          |          |
| HZ_HS11  | OR460807 | OR466985 | OR476711 | OR467004 | OR476741 |
| HZ_HS12  | OR460807 | OR466985 | OR476711 | OR467004 | OR476741 |
| MW_HS1   | OR460807 | OR466985 | OR476711 | OR467004 |          |
| MW_HS2   | OR460807 | OR466985 | OR476711 |          |          |
| MW_HS3   | OR460807 | OR466985 | OR476711 | OR467004 | OR476741 |
| MW_HS4   | OR460807 | OR466985 | OR476711 |          |          |
| MW_HS5   | OR460807 | OR466985 | OR476711 |          |          |
| MW_HS6   | OR460807 | OR466985 | OR476711 |          |          |
| FCG_HS1  | OR460807 | OR466985 | OR476711 | OR467004 |          |
| FCG_HS2  | OR460807 | OR466985 | OR476712 | OR467004 | OR476741 |
| FCG_HS4  | OR460807 | OR466985 |          |          | OR476741 |
| FCG_HS5  | OR460807 | OR466985 |          |          | OR476741 |
| WZD_HS1  | OR460807 | OR466985 |          |          | OR476741 |
| WZD_HS2  | OR460807 |          |          |          |          |
| WZD_HS3  | OR460807 |          |          |          |          |
| WZD_HS5  | OR460807 | OR466985 | OR476711 | OR467004 | OR476741 |
| WZD_HS6  | OR460807 | OR466985 | OR476711 | OR467004 | OR476741 |
| WZD_HS7  | OR460807 |          |          |          |          |
| WZD_HS8  | OR460807 |          |          |          |          |
| WZD_HS9  | OR460807 |          |          |          |          |
| WZD_HS10 | OR460807 |          |          |          |          |
| WZD_HS11 | OR460807 |          |          |          |          |
| WZD_HS12 | OR460807 |          |          | OR467004 |          |
| WZD_HS13 | OR460807 |          |          | OR467004 |          |
| XW_HS1   | OR460807 | OR466985 | OR476711 | OR467004 | OR476741 |
| XW_HS2   | OR460807 | OR466985 | OR476711 |          |          |
| XW_HS3   | OR460807 |          |          |          | OR476741 |
| XW_HS4   | OR460807 |          |          |          |          |

|          |           |          |          |          |          |
|----------|-----------|----------|----------|----------|----------|
| XW_HS5   | OR460807  |          |          |          |          |
| XW_HS6   | OR460807  |          |          |          |          |
| XW_HS7   | OR460807  |          |          |          |          |
| DZ_HS1   | OR460807  | OR466985 | OR476711 | OR467004 | OR476741 |
| DZ_HS2   | OR460807  | OR466985 | OR476711 | OR467004 | OR476741 |
| DZ_HS3   | OR460807  | OR466985 |          |          |          |
| DZ_HS4   | OR460807  | OR466985 |          |          | OR476741 |
| DZ_HS5   | OR4608020 | OR466994 | OR476719 | OR467006 | OR476743 |
| DZ_HS6   | OR4608021 | OR466993 | OR476720 | OR467006 | OR476743 |
| DZ_HS7   | OR460807  | OR466985 |          |          | OR476741 |
| DZ_HS8   | OR460807  | OR466985 |          |          | OR476741 |
| DZ_HS9   | OR460807  |          |          |          |          |
| DZ_HS10  | OR460807  |          |          |          |          |
| DZ_HS11  | OR460807  |          |          |          |          |
| DZ_HS12  | OR460807  |          |          |          |          |
| DZ_HS13  | OR4608018 | OR466993 | OR476721 | OR467006 | OR476743 |
| DZ_HS14  | OR4608019 | OR466993 | OR476722 | OR467006 | OR476743 |
| JJD_HS1  | OR4608011 | OR466988 |          | OR467005 | OR476742 |
| JJD_HS2  | OR4608012 | OR466989 | OR476715 | OR467005 | OR476742 |
| JJD_HS5  | OR4608013 | OR466990 | OR476716 | OR467005 | OR476742 |
| JJD_HS6  | OR460807  |          |          |          |          |
| JJD_HS7  | OR4608014 | OR466991 | OR476717 | OR467005 | OR476742 |
| JJD_HS8  | OR4608015 | OR466992 | OR476715 | OR467005 | OR476742 |
| SYHS_HS1 | OR4608033 | OR466995 | OR476737 | OR467007 | OR476744 |
| SYHS_HS2 | OR4608024 | OR466995 | OR476738 | OR467007 | OR476744 |
| SYHS_HS3 | OR4608034 | OR466995 | OR476739 | OR467007 | OR476744 |
| LHT_HS1  | OR4608022 | OR466995 | OR476726 | OR467007 | OR476744 |
| LHT_HS2  | OR4608018 | OR466993 | OR476723 | OR467006 | OR476743 |
| LHT_HS3  | OR4608030 | OR466996 | OR476728 | OR467007 | OR476744 |
| LHT_HS4  | OR4608024 | OR466995 | OR476727 | OR467007 | OR476744 |
| LHT_HS5  | OR4608024 | OR466995 | OR476726 |          | OR476744 |
| LHT_HS6  | OR4608024 | OR466997 |          |          | OR476744 |
| LHT_HS7  | OR460809  | OR466987 | OR476713 | OR467004 | OR476741 |
| LHT_HS8  | OR4608032 | OR466995 | OR476729 |          | OR476744 |
| LHT_HS9  | OR4608024 | OR466998 |          | OR467007 | OR476744 |
| LHT_HS10 | OR4608018 | OR466993 | OR476720 | OR467006 | OR476743 |
| LHT_HS11 | OR4608023 | OR466995 | OR476730 | OR467007 | OR476744 |
| LHT_HS12 | OR4608024 | OR466995 | OR476731 | OR467007 | OR476744 |
| LHT_HS13 | OR4608016 | OR466989 |          | OR467005 | OR476742 |
| LHT_HS14 | OR4608024 | OR466999 | OR476732 |          | OR476744 |
| LHT_HS15 | OR460807  | OR466985 | OR476711 | OR467004 | OR476741 |

|                              |           |          |          |          |          |
|------------------------------|-----------|----------|----------|----------|----------|
| LHT_HS16                     | OR460807  | OR466985 | OR476711 | OR467004 | OR476741 |
| LHT_HS17                     | OR4608024 | OR466995 |          | OR467007 | OR476744 |
| LHT_HS18                     | OR4608014 | OR466989 | OR476715 | OR467005 | OR476742 |
| LHT_HS19                     | OR4608017 | OR466989 | OR476718 | OR467005 | OR476742 |
| LHT_HS20                     | OR4608024 | OR467000 |          | OR467007 | OR476744 |
| LHT_HS21                     | OR460808  | OR466986 | OR476711 | OR467004 | OR476741 |
| LHT_HS22                     | OR4608025 | OR467001 | OR476733 | OR467007 | OR476744 |
| LHT_HS23                     | OR4608026 | OR466995 | OR476734 |          | OR476744 |
| LHT_HS24                     | OR4608027 | OR466995 |          |          | OR476744 |
| LHT_HS25                     | OR4608028 | OR466999 | OR476726 | OR467007 | OR476744 |
| LHT_HS26                     | OR4608029 | OR467002 | OR476735 | OR467007 | OR476744 |
| LHT_HS27                     | OR4608018 | OR466993 | OR476725 | OR467006 | OR476743 |
| LHT_HS28                     | OR460807  | OR466985 | OR476711 |          | OR476741 |
| LHT_HS29                     | OR4608024 | OR466995 |          |          | OR476744 |
| LHT_HS30                     | OR4608031 | OR466995 | OR476736 | OR467007 | OR476744 |
| LHT_HS31                     | OR4608018 | OR466993 | OR476724 | OR467006 | OR476743 |
| Australia_1                  | NC025572  | NC025572 | NC025572 |          |          |
| <i>Pisidia serratifrons</i>  | OR460835  | OR467003 | OR476740 | OR467008 | OR476745 |
| <i>Pisidia magdalenensis</i> |           | MN715756 | MN712001 | MN715573 | MN712187 |
| P_AH135                      | KY857297  | KY857020 | MN711994 | MN715566 | MN712180 |
| P_AHG16A                     | KY857428  | KY857151 |          |          |          |
| P_AHU19A                     | KY857525  | KY857248 | MN711996 | MN715568 | MN712182 |
| P_AHO11A                     | KY857520  | KY857243 | MN711997 | MN715569 | MN712183 |

Table S2. The number of all dataset and mito dataset obtained through Phylosuit.

| Location      | Group                        | Taxon                        | Mito dataset | All dataset |
|---------------|------------------------------|------------------------------|--------------|-------------|
| Xiaguan       | XG                           | <i>P. haswelli</i>           | 10           | 1           |
| Dongshan      | DS                           | <i>P. haswelli</i>           | 8            | 2           |
| Huizhou       | EC                           | <i>P. haswelli</i>           | 8            | 2           |
| Miaowan       |                              | <i>P. haswelli</i>           | 6            | 1           |
| Xuwen         | BH                           | <i>P. haswelli</i>           | 2            | 1           |
| Fangchenggang |                              | <i>P. haswelli</i>           | 2            | 1           |
| Weizhoudao    |                              | <i>P. haswelli</i>           | 2            | 2           |
| Danzhou       |                              | <i>P. haswelli</i>           | 2            | 2           |
|               |                              | <i>P. polychaetus</i>        | 4            | 4           |
| Jiajingdao    | HN                           | <i>P. haswelli</i>           | 1            | 0           |
| Sanyahouhai   |                              | <i>P. lamarckii</i>          | 4            | 4           |
|               |                              | <i>P. shanyingi</i> sp. nov. | 3            | 3           |
|               |                              | <i>P. haswelli</i>           | 5            | 4           |
|               |                              | <i>P. polychaetus</i>        | 4            | 4           |
| Luhuitou      |                              | <i>P. lamarckii</i>          | 2            | 2           |
|               | <i>P. shanyingi</i> sp. nov. | 13                           | 9            |             |

Table S3. Best-fit model according to BIC of ML and Bayesian tree.

| Data         | ML Tree                                                                     | Bayesian Tree                                                        |
|--------------|-----------------------------------------------------------------------------|----------------------------------------------------------------------|
| COI          | TIM2+F+G4                                                                   |                                                                      |
| 16S          | K3Pu+F+G4                                                                   |                                                                      |
| Cytb         | TPM3+F+I                                                                    |                                                                      |
| 18S          | K2P                                                                         |                                                                      |
| H3           | HKY+F+I                                                                     |                                                                      |
| Mito dataset | TPM2u+F+G4: CO1,<br>K3Pu+F+G4: 16S,<br>TPM3+F+G4: CYTB.                     |                                                                      |
| All dataset  | TPM2u+F+G4: CO1,<br>K3Pu+F+I: 16S,<br>K2P+I: 18S+H3,<br>TPM3u+F+I+G4: CYTB. | GTR+F+G4: CO1,<br>HKY+F+I: 16S,<br>K2P+I: 18S+H3,<br>HKY+F+G4: CYTB. |

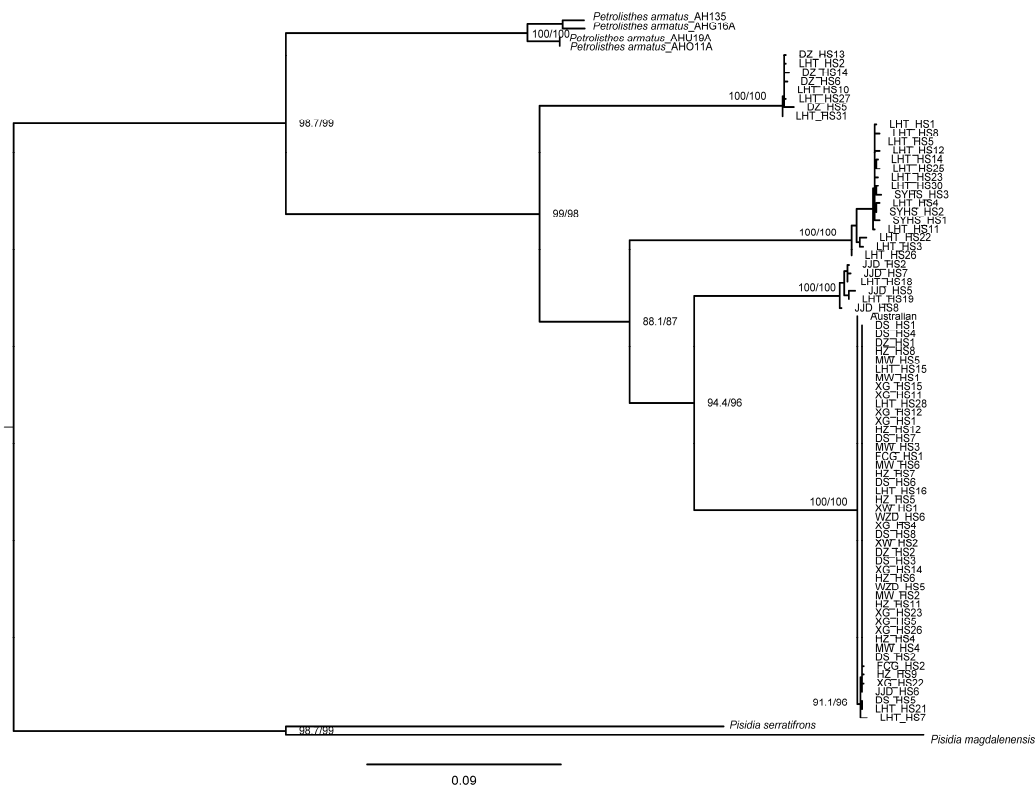

Figure S1. Maximum likelihood phylogeny of *Petrolisthes* derived from a concatenated mitochondrial (16S, COI and Cytb) dataset using IQ-Tree.





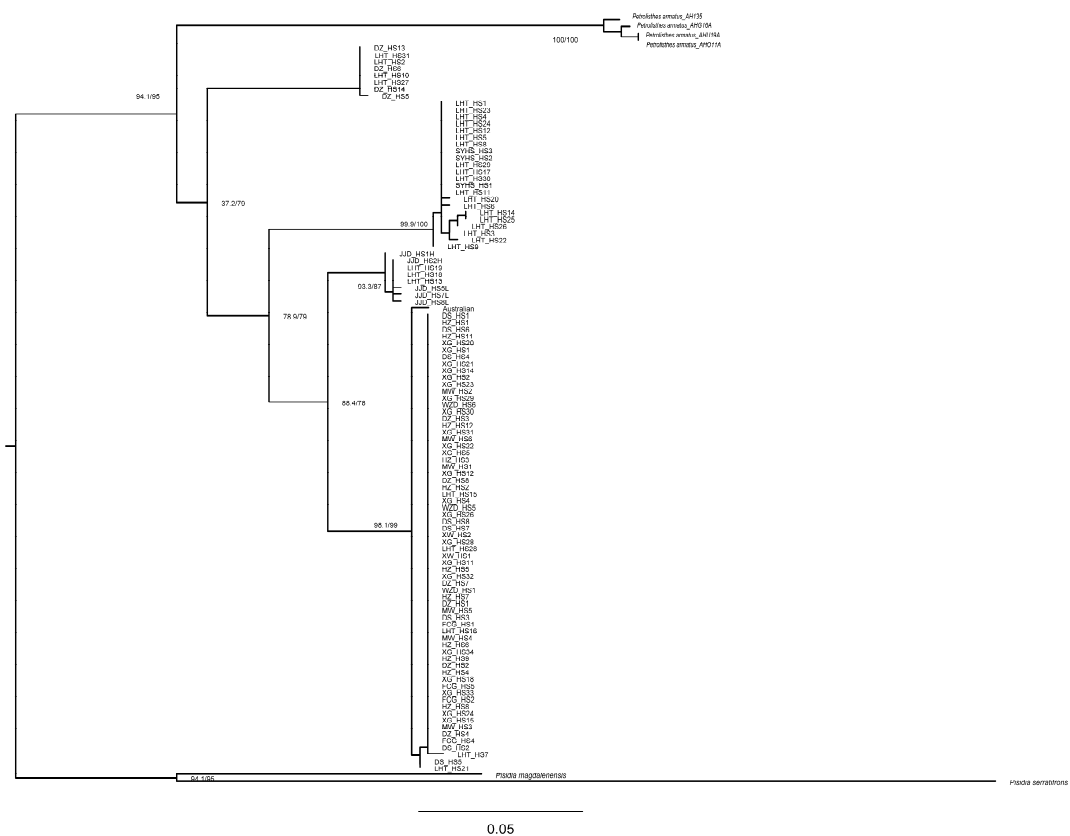

Figure S3. Maximum likelihood phylogeny of *Petrolisthes* derived from 16S dataset using IQ-Tree.

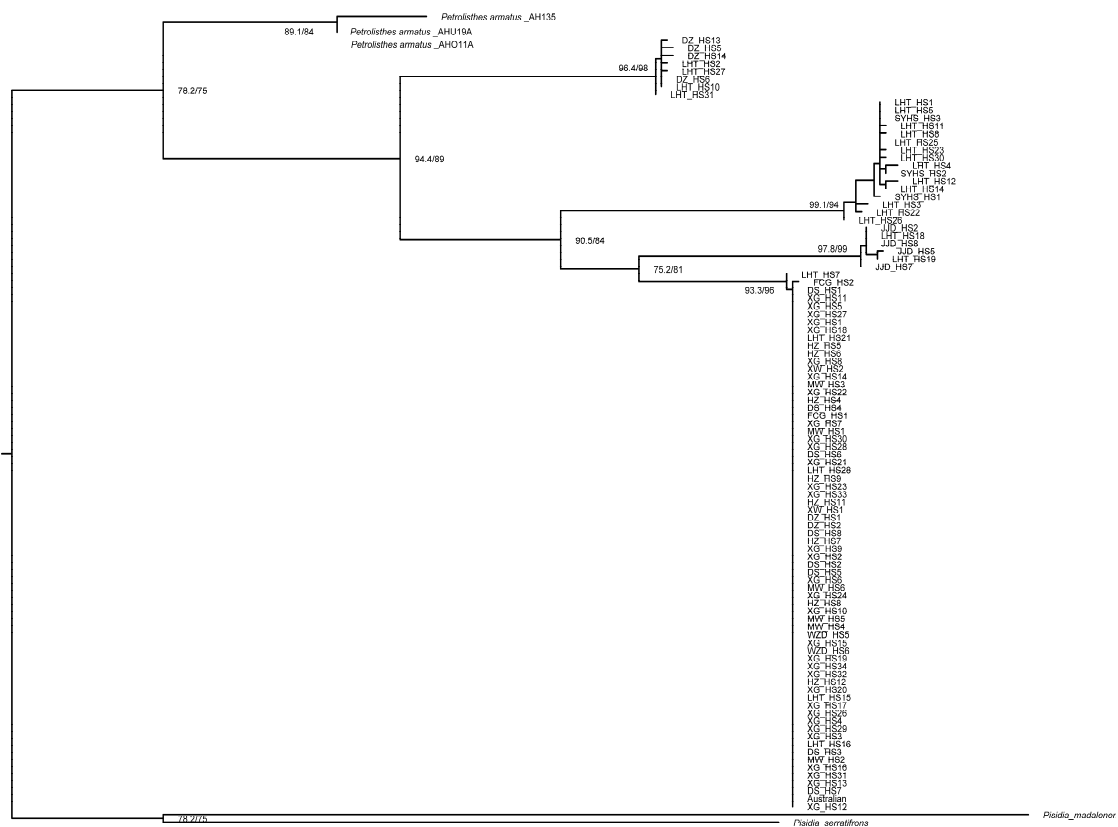

Figure S4. Maximum likelihood phylogeny of *Petrolisthes* derived from Cytb dataset using IQ-Tree.

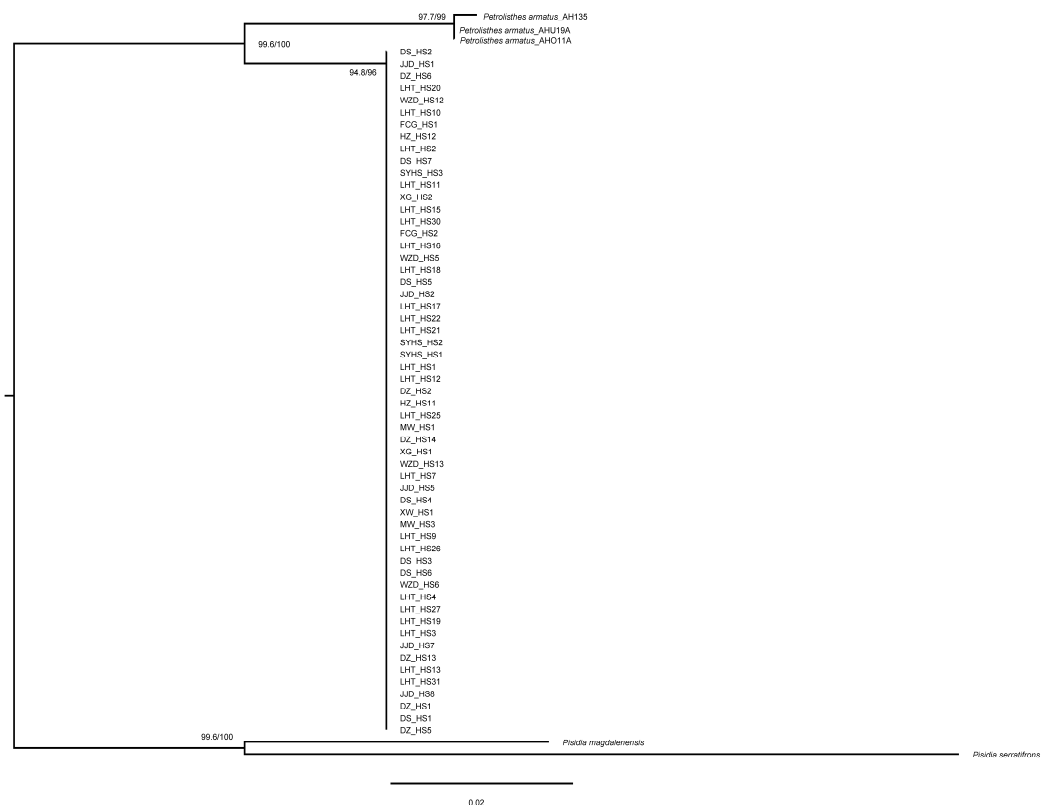

Figure S5. Maximum likelihood phylogeny of *Petrolisthes* derived from 18S dataset using IQ-Tree.

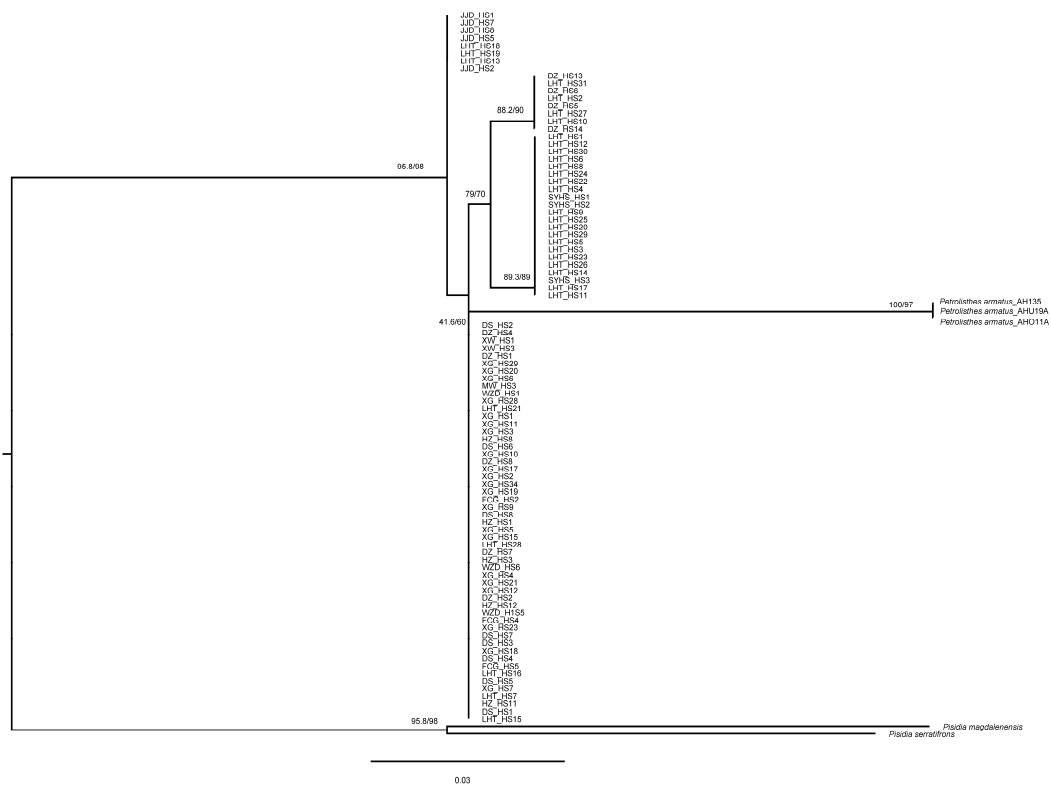

Figure S6. Maximum likelihood phylogeny of *Petrolisthes* derived from H3 dataset using IQ-Tree.

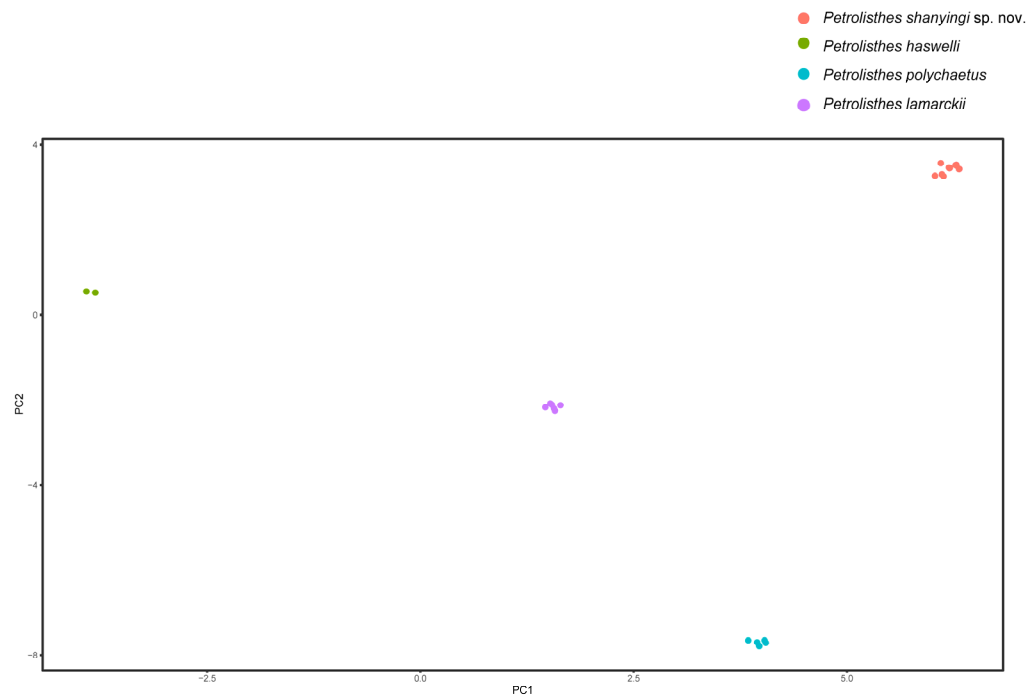

Figure S7. Scatterplot generated by analysis of principal components of *Petrolisthes* based on mito dataset among lineages.
